# Supplementary material for: A new approach for measuring the carbon and oxygen content of atmospherically relevant compounds and mixtures
Source: Copernicus journal article supplement (doi:10.5194/amt-13-4911-2020), 2020-09-18
Supplement: Supplementary file 1 [file amt-13-4911-2020-supplement.zip]

Archive with 3 entries (3 files):
- amt-2020-44 Supplementary Information.pdf
- amt-2020-44_SupplementaryData.xlsx
- amt-13-4911-2020-supplement-title-page.pdf
