# Supplementary material for: A new approach for measuring the carbon and oxygen content of atmospherically relevant compounds and mixtures
Source: Copernicus journal article supplement (doi:10.5194/amt-13-4911-2020), 2020-09-18
Supplement: Supplementary file 1 [file amt-13-4911-2020-supplement.zip › amt-13-4911-2020-supplement-title-page.pdf]

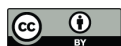

## *Supplement of*

# **A new approach for measuring the carbon and oxygen content of atmospherically relevant compounds and mixtures**

**James F. Hurley et al.**

*Correspondence to:* Gabriel Isaacman-VanWertz (ivw@vt.edu)

- [amt-13-4911-2020-supplement-title-page.pdf](#)
- [amt-2020-44 Supplementary Information.pdf](#)
- [amt-2020-44\\_SupplementaryData.xlsx](#)

The copyright of individual parts of the supplement might differ from the CC BY 4.0 License.
