# Supplementary material for: A new approach for measuring the carbon and oxygen content of atmospherically relevant compounds and mixtures
Source: Copernicus journal article supplement (doi:10.5194/amt-13-4911-2020), 2020-09-18
Supplement: Supplementary file 1 [file amt-13-4911-2020-supplement.zip › amt-2020-44 Supplementary Information.pdf]

**S1 Estimated CO<sub>2</sub> produced in the FID combustion of atmospheric particles**

In order to estimate the feasibility of measuring bulk atmospheric particles by combusting them in an FID and measuring the CO<sub>2</sub> produced, operating conditions for a theoretical instrument are examined here. In this instrument, particles would be sampled and thermally desorbed to an FID, with CO<sub>2</sub> detected downstream, a detector train similar to the instrument used in this work. Table S1 provides assumptions and resulting measured values of such an instrument, with the basis of these assumptions discussed here. Total flow rate of FID gases (hydrogen and air) is in the range of 250 to 400 sccm based on typical instrument operating conditions. The instrument is assumed to sample at flows of 0.3 to 1.5 lpm, as these are typical operating conditions for aerosol instrumentation, with a time resolution of one to two hours (roughly 60-120 minutes of sampling time, though actually some turnaround time would be necessary). The duration of the desorption process is estimated at 5 to 20 seconds, which impacts the relative sharpness (and thus height) of the signal observed. Two scenarios are tested to bound the operating conditions. In a low signal case, all parameters are set to minimize signal, particle concentrations are assumed to be low (0.5 µg/m<sup>3</sup>), and the fraction of that mass that is carbon is assumed to be on the low end of typical ambient conditions (OM/OC = 2) (Aiken et al., 2008). In a high signal case, all parameters are set to maximize signal, particle concentrations are assumed to be moderate (10 µg/m<sup>3</sup>), and the fraction of that mass that is carbon is assumed to be on the high end of typical ambient conditions (OM/OC = 1.4).

**Table S1. Assumptions and calculations to estimate amount of CO<sub>2</sub> produced in the combustion of atmospherically-relevant concentrations of organic aerosol.**

| <i>Assumptions:</i>                                          | <b>High signal case</b> | <b>Low signal case</b> |
|--------------------------------------------------------------|-------------------------|------------------------|
| Total flow of all FID gases (cm <sup>3</sup> /min)           | <b>250</b>              | <b>400</b>             |
| Organic aerosol concentration (µg/m <sup>3</sup> )           | <b>10</b>               | <b>0.5</b>             |
| Organic mass/organic carbon (OM/OC)                          | <b>1.4</b>              | <b>2</b>               |
| Instrument sample flow rate (l/min)                          | <b>1.5</b>              | <b>0.3</b>             |
| Sample interval (min)                                        | <b>120</b>              | <b>60</b>              |
| Duration of desorption (sec)                                 | <b>5</b>                | <b>20</b>              |
| <i>Calculations:</i>                                         |                         |                        |
| Sampled carbon (ng)                                          | <b>1286</b>             | <b>5</b>               |
| Carbon reaching FID (ng/s)                                   | <b>257</b>              | <b>0.225</b>           |
| Concentration of carbon in FID outflow (ng/cm <sup>3</sup> ) | <b>62</b>               | <b>0.03</b>            |
| Concentration of carbon in FID outflow (ppb)                 | 123,840                 | 68                     |

## S2 Determination of rECN

- 20 Relative ECN values were calculated based on the method of Scanlon and Willis, 1985, Table 1. These authors credit Sternberg et al. (1962, Gas Chromatography, Academic Press, pp.231-267) for their values (Scanlon and Willis, 1985). Tables S2 below gives the relevant ECNs used in our work.

**Table S2. Assignments of ECNs as described by Scanlon and Willis, 1985.**

| <u>Atom</u> | <u>Type</u>       | <u>ECN contribution</u> |
|-------------|-------------------|-------------------------|
| C           | Aliphatic         | 1                       |
| C           | Aromatic          | 1                       |
| C           | Olefinic          | 0.95                    |
| C           | Carbonyl          | 0                       |
| C           | Carboxyl          | 0                       |
| O           | Ether             | -1.0                    |
| O           | Primary Alcohol   | -0.5                    |
| O           | Secondary Alcohol | -0.75                   |
| O           | Tertiary Alcohol  | -0.25                   |

- 25 Example calculation

Consider linalool, 3,7-dimethyl-1,6-octadien-3-ol ( $C_{10}H_{18}O$ ). There are two alkene functionalities and therefore four olefinic carbons. There are six aliphatic carbons. There is also a tertiary alcohol.

$$6 \text{ (aliphatic C)} + 4 \text{ (olefinic C)} + 1 \text{ (tertiary alcohol O)} = 6(1) + 4(0.95) + 1(-0.25) = 9.55$$

30

The ECN of linalool is therefore 9.55

$$\text{The rECN of linalool} = \frac{ECN}{Total Carbon Number} = \frac{9.55}{10} = 0.955$$

35

For multifunctional aromatics, the method of Jorgensen et al, 1990, Table IX was used (Jorgensen et al., 1990). Table S3 below gives the relevant reductions used in our work.

**Table S3. Reductions in ECN described by Jorgensen,1990, for substituent groups on aromatics.**

| <u>Functionality on aromatic compound</u> | <u>Reduction</u> |
|-------------------------------------------|------------------|
| Ketone                                    | 0.80             |
| Ether                                     | 0.78             |
| Phenol                                    | 0.64             |

40

Example calculation

Consider vanillin, C<sub>8</sub>H<sub>8</sub>O<sub>3</sub>. The aromatic ring has hydroxy (phenol), methoxy (ether) and aldehyde (treat as ketone) substituents.

In this method, the ECN is determined by applying the reductions to the total carbon number.

45 Total carbon # - reductions = 8 – phenol - ether - aldehyde = 8 - 0.80 - 0.78 - 0.64 = 5.78

ECN of vanillin = 5.78

$$\text{rECN vanillin} = \frac{\text{ECN}}{\text{Total Carbon Number}} = \frac{5.78}{8} = 0.7225$$

50

### S3 Theoretical slopes of rECN

A plot of relative ECN versus O/C for three different categories of functional groups is shown in Figure S1. The impact of carbonyls and carboxyls (esters/acids) are independent of chemical structure, so rECN decreases with O/C at slopes of exactly -1.0 and -0.5, respectively. The impact of hydroxyl groups on rECN varies depending on whether the alcohol is primary, secondary, or tertiary, so the average slope is structurally dependent. A representative slope (-0.58) is shown based on the estimated rECN of the alcohols provided in Table S4 ( $R^2 = 0.93$ ). Relative ECN values were calculated based on the method determining ECN of Scanlon and Willis (1985). For all three categories, at least one aromatic and one multifunctional compound were chosen (e.g. benzaldehyde and glyoxal were chosen as carbonyls).

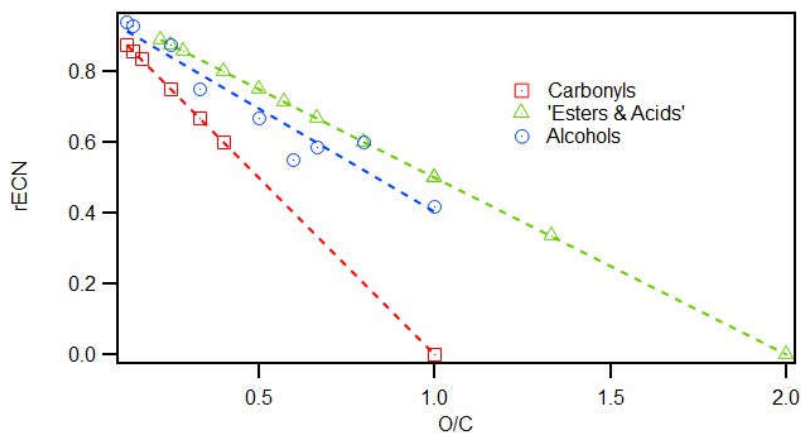

Figure S1: Plots of calculated relative ECN (rECN) versus O/C for compounds comprised exclusively of different functional groups.

Table S4. List of the compounds used to generate the slope of the relationship between rECN and O/C plot for alcohols.

| Compound           | Formula                                       | O/C   | Relative ECN |
|--------------------|-----------------------------------------------|-------|--------------|
| 1,3,5-Hexanetriol  | C <sub>6</sub> H <sub>14</sub> O <sub>3</sub> | 0.5   | 0.667        |
| 2,3,4-Pentanetriol | C <sub>5</sub> H <sub>12</sub> O <sub>3</sub> | 0.6   | 0.55         |
| Propylene glycol   | C <sub>3</sub> H <sub>8</sub> O <sub>2</sub>  | 0.667 | 0.583        |
| Pentaerythritol    | C <sub>5</sub> H <sub>12</sub> O <sub>4</sub> | 0.8   | 0.6          |
| Glycerol           | C <sub>3</sub> H <sub>8</sub> O <sub>3</sub>  | 1     | 0.417        |
| 1-Butanol          | C <sub>4</sub> H <sub>10</sub> O              | 0.25  | 0.875        |
| 1-Octanol          | C <sub>8</sub> H <sub>18</sub> O              | 0.125 | 0.938        |
| Isopropanol        | C <sub>3</sub> H <sub>8</sub> O               | 0.333 | 0.75         |
| Benzyl alcohol     | C <sub>7</sub> H <sub>8</sub> O               | 0.143 | 0.929        |

#### S4 Summary list of the 89 analytes with their functionalities and vapor pressure

65 Table S5 gives the functional groups and vapor pressures (via EPI Suite database,(US EPA, 2019)).

Of the 89 total compounds, 20 were n-alkanes. Of the remaining 69 compounds, 46 were multifunctional (marked with an asterisk\*). The overall counts of compounds containing a functionality were: 20 alkanes, 18 alkenes, 29 aromatics, 13 ethers, 29 esters, 6 aldehydes, 8 ketones, 35 alcohols, 1 acid, 1 epoxide, 2 lactones (also counted as esters) and 2 polycyclic aromatics (also counted as aromatics). Therefore, pentaerythritol counts as 1 alcohol, whereas hydroxyacetone is counted as  
70 both an ester and an alcohol.

The volatility range (through EPI) was 3.38 E-6 to 8120 Pa (pentaerythritol to ethanol).

**Table S5. Functional groups present and vapor pressures for the 89 analytes. An asterisk\* denotes a multifunctional compound.**

| <u>#</u> | <u>Compound</u> | <u>Functional groups</u> | <u>VP (Pa)</u> |
|----------|-----------------|--------------------------|----------------|
| 1        | Heptane         | alkane                   | 6120           |
| 2        | Octane          | alkane                   | 1980           |
| 3        | Nonane          | alkane                   | 661            |
| 4        | Decane          | alkane                   | 231            |
| 5        | Undecane        | alkane                   | 83.8           |
| 6        | Dodecane        | alkane                   | 31.5           |
| 7        | Tridecane       | alkane                   | 12.3           |
| 8        | Tetradecane     | alkane                   | 4.92           |
| 9        | Pentadecane     | alkane                   | 2.03           |
| 10       | Hexadecane      | alkane                   | 0.929          |
| 11       | Heptadecane     | alkane                   | 0.432          |
| 12       | Octadecane      | alkane                   | 0.195          |
| 13       | Nonadecane      | alkane                   | 0.0897         |
| 14       | Icosane         | alkane                   | 0.0413         |
| 15       | Henicosane      | alkane                   | 0.0189         |
| 16       | Docosane        | alkane                   | 0.00923        |
| 17       | Tricosane       | alkane                   | 0.00473        |

|    |                                                 |                              |           |
|----|-------------------------------------------------|------------------------------|-----------|
| 18 | Tetracosane                                     | alkane                       | 0.00226   |
| 19 | Pentacosane                                     | alkane                       | 0.00128   |
| 20 | Limonene                                        | alkene                       | 207       |
| 21 | 1,2,4-Trimethylbenzene                          | aromatic                     | 215       |
| 22 | Naphthalene                                     | polycyclic aromatic          | 5.38      |
| 23 | Isophytol*                                      | alkene, alcohol              | 0.00188   |
| 24 | Patchouli alcohol                               | alcohol                      | 0.0328    |
| 25 | Butylated hydroxytoluene*                       | aromatic, alcohol            | 0.236     |
| 26 | alpha-Cetone*                                   | dialkene, ketone             | 1.3       |
| 27 | Methyl ionone*                                  | dialkene, ketone             | 0.868     |
| 28 | 2-Dodecanol                                     | alcohol                      | 0.381     |
| 29 | Phytol acetate*                                 | alkene, ester                | 0.0048    |
| 30 | Linalool*                                       | dialkene, alcohol            | 11.1      |
| 31 | alpha-Terpineol*                                | alkene, alcohol              | 5.64      |
| 32 | Citronellal*                                    | alkene, alcohol              | 5.88      |
| 33 | 2-Naphthol*                                     | polycyclic aromatic, alcohol | 0.0218    |
| 34 | 2-Nonanone                                      | ketone                       | 86.2      |
| 35 | 1-Octanol                                       | alcohol                      | 13.2      |
| 36 | Phenylethyl alcohol*                            | aromatic, alcohol            | 3.24      |
| 37 | Tetradecanoic acid ethyl ester                  | ester                        | 0.339     |
| 38 | 2-Hydroxycyclopentadecanone*                    | ketone, alcohol              | 0.0000602 |
| 39 | 1,1,-Dimethyl-2-Phenyl ester butanoic acid*     | aromatic, ester              | 0.343     |
| 40 | Benzyl benzoate*                                | aromatic (two rings), ester  | 0.0741    |
| 41 | 2-Heptanone                                     | ketone                       | 655       |
| 42 | Methyl laurate                                  | ester                        | 1.45      |
| 43 | 4-Tertbutyl cyclohexyl acetate                  | ester                        | 9.13      |
| 44 | Benzene ethanol, alpha, alpha-dimethyl acetate* | aromatic, ester              | 3.17      |
| 45 | Linalyl acetate*                                | dialkene, ester              | 17.5      |
| 46 | Hexanal                                         | aldehyde                     | 1280      |

|    |                                             |                                      |           |
|----|---------------------------------------------|--------------------------------------|-----------|
| 47 | Peach lactone                               | lactone (ester)                      | 0.545     |
| 48 | meta-Eugenol*                               | alkene, aromatic, ether, alcohol     | 0.311     |
| 49 | 3,5,5- Trimethyl hexyl acetate              | ester                                | 50.9      |
| 50 | Safrole*                                    | alkene, aromatic, diether            | 0.24      |
| 51 | Eugenol*                                    | alkene, aromatic, ether, alcohol     | 1.26      |
| 52 | Allyl heptanoate*                           | alkene, ester                        | 30.2      |
| 53 | 2-Methoxy-3-(2-Propenyl) phenol*            | alkene, aromatic, ether, alcohol     | 0.311     |
| 54 | Hydroxy-citronellal*                        | aldehyde, alcohol                    | 0.773     |
| 55 | Benzene methanol alpha-methyl acetate*      | aromatic, ester                      | 14.9      |
| 56 | Benzyl salicylate*                          | aromatic (two rings), ester, alcohol | 0.0024    |
| 57 | Benzyl acetate*                             | aromatic, ester                      | 25        |
| 58 | Hexanoic acid, propenyl ester*              | alkene, ester                        | 96.1      |
| 59 | Hedione*                                    | ketone, ester                        | 0.158     |
| 60 | 2-Phenoxyethyl isobutyrate*                 | aromatic, ether, ester               | 0.701     |
| 61 | 2-Hydroxy-2-Methylbutyl ester benzoic acid* | aromatic, ester, alcohol             | 0.0174    |
| 62 | Isoamyl salicylate*                         | aromatic, ester, alcohol             | 0.0868    |
| 63 | Acetic acid, Hexyl ester                    | ester                                | 194       |
| 64 | Strawberry aldehyde*                        | aromatic, ester, epoxide             | 0.423     |
| 65 | Indan-1,3-Monopropionate*                   | aromatic, ester, alcohol             | 0.0129    |
| 66 | 1-Butanol                                   | alcohol                              | 1040      |
| 67 | Ethylene brassylate*                        | dilactone (diester)                  | 0.0000585 |
| 68 | Myristicin*                                 | alkene, aromatic, triether           | 0.861     |
| 69 | Indan-1,3-Diol monoacetate*                 | aromatic, ester, alcohol             | 0.0398    |
| 70 | Prenyl acetate*                             | alkene, ester                        | 556       |
| 71 | Isopropanol                                 | alcohol                              | 6610      |
| 72 | 1-Propanol                                  | alcohol                              | 3090      |
| 73 | Diethyl phthalate*                          | aromatic, diester                    | 0.339     |
| 74 | Ethyl vanillin*                             | aromatic, aldehyde, ether, alcohol   | 0.039     |
| 75 | Vanillin*                                   | aromatic, aldehyde, ether, alcohol   | 0.0595    |

|           |                                           |                                      |          |
|-----------|-------------------------------------------|--------------------------------------|----------|
| <b>76</b> | Piperonal*                                | aromatic, aldehyde, diether          | 1.41     |
| <b>77</b> | Isopropyl acetate                         | ester                                | 8110     |
| <b>78</b> | Syringaldehyde*                           | aromatic, aldehyde, diether, alcohol | 0.00865  |
| <b>79</b> | Maltol*                                   | aromatic (pyrone), ketone, alcohol   | 0.00571  |
| <b>80</b> | 1-Methoxy-2-Propanol*                     | ether, alcohol                       | 984      |
| <b>81</b> | Ethyl acetoacetate ethylene ketal*        | diether, ester                       | 18.1     |
| <b>82</b> | 5-Hydroxymethyl-2-(Dimethoxymethyl)furan* | aromatic(furan), diether, alcohol    | 0.168    |
| <b>83</b> | HEM (Hydroxyethyl methacrylate)*          | alkene, ester, alcohol               | 10.6     |
| <b>84</b> | Ethanol                                   | alcohol                              | 8120     |
| <b>85</b> | Propylene glycol                          | di-alcohol                           | 14.8     |
| <b>86</b> | Hydroxyacetone*                           | ketone, alcohol                      | 232      |
| <b>87</b> | Pentaerythritol                           | tetra-alcohol                        | 3.38E-06 |
| <b>88</b> | Acetic acid                               | acid                                 | 2290     |
| <b>89</b> | Glycerol                                  | tri-alcohol                          | 0.0106   |

### S5 Comparison of FID/CO<sub>2</sub> across Systems 1, 2, and 3

To test the reproducibility of measured FID/CO<sub>2</sub>, 14 compounds were run on more than one instrumental configuration. Of these 14 compounds, 11 were run on two configurations. The relative error of the FID/CO<sub>2</sub> measured for each system was calculated as the difference between the measured value and the mean of FID/CO<sub>2</sub> measured for that compound for all systems tested, relative to the mean. The average relative error is  $2.1\% \pm 1.8\%$ , with a maximum relative error of 6.6%. The range of errors for all 14 compounds is shown in Figure S2.

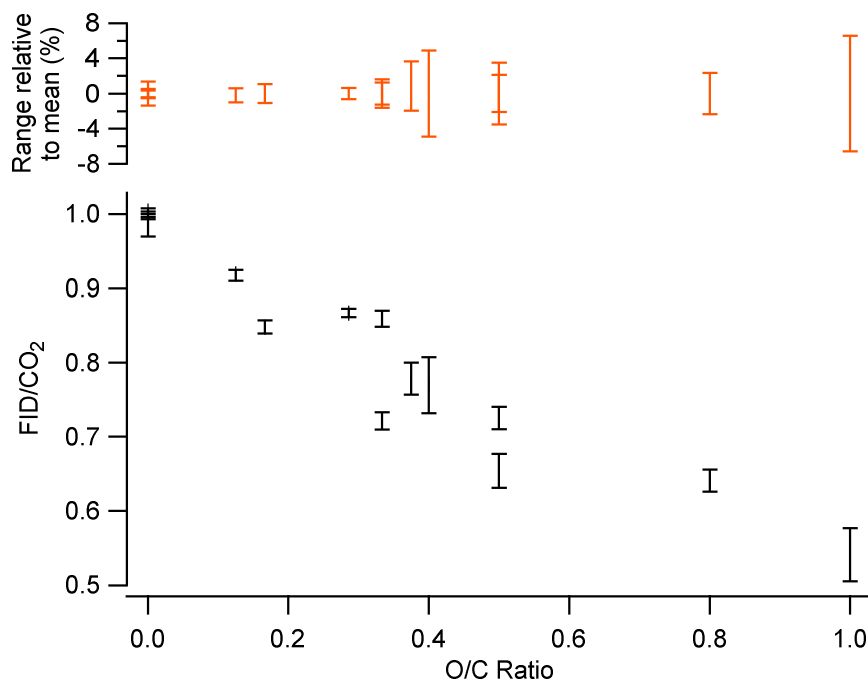

Figure S2: FID/CO<sub>2</sub> versus O/C for the 14 compounds analysed in multiple instrument configurations. Error bars show minimum and maximum value measured for each compound. Relative error shown on top as the ratio of the extrema to the mean. For the 11 compounds run on only two configurations, the extrema are symmetric about zero.

## 90 S6 Error in Complete Combustion Experiments

The data for the complete combustion experiments are presented in Table S6. As described in Section 3.1, squalene and diethyl phthalate were dissolved in dichloromethane, whereas hydroxyethyl methacrylate (HEM) and propylene glycol were dissolved in water. See also Figure 3 of the text.

95 **Table S6. Results for the complete combustion experiments**

| <u>Compound</u>   | <u>Number of injections</u> | <u>Mean % yield<br/>± Std Dev</u> |
|-------------------|-----------------------------|-----------------------------------|
| Squalene          | 23                          | 95.2 ± 5.5                        |
| Diethyl Phthalate | 23                          | 95.7 ± 5.3                        |
| HEM               | 21                          | 100.2 ± 12.8                      |
| Propylene Glycol  | 33                          | 87.2 ± 7.4                        |
| <i>All points</i> |                             | 93.7 ± 9.5                        |

## S7 Uncertainty in the correlations between rECN, O/C and FID/CO<sub>2</sub>

Uncertainties for the slope and intercept of the three plots of Figure 4 are given in Table S7.

**Table S7. Correlation parameters and uncertainties for Figure 4 plots**

| <u>Figure</u> | <u>Plot</u>                 | <u>Slope ± error</u> | <u>% error</u> | <u>Intercept ± error</u> | <u>% error</u> |
|---------------|-----------------------------|----------------------|----------------|--------------------------|----------------|
| <b>4a</b>     | FID/CO <sub>2</sub> vs O/C  | -0.54 ± 0.02         | 3.7            | 0.98 ± 0.01              | 0.6            |
| <b>4b</b>     | FID/CO <sub>2</sub> vs rECN | 0.85 ± 0.03          | 3.8            | 0.14 ± 0.03              | 21.5           |
| <b>4c</b>     | rECN vs O/C                 | -0.60 ± 0.02         | 3.1            | 0.99 ± 0.01              | 0.6            |

## References

- 105 Aiken, A. C., Decarlo, P. F., Kroll, J. H., Worsnop, D. R., Huffman, J. A., Docherty, K. S., Ulbrich, I. M., Mohr, C., Kimmel, J. R., Sueper, D., Sun, Y., Zhang, Q., Trimborn, A., Northway, M., Ziemann, P. J., Canagaratna, M. R., Onasch, T. B., Alfarra, M. R., Prevot, A. S. H., Dommen, J., Duplissy, J., Metzger, A., Baltensperger, U. and Jimenez, J. L.: O/C and OM/OC ratios of primary, secondary, and ambient organic aerosols with high-resolution time-of-flight aerosol mass spectrometry, *Environ. Sci. Technol.*, 42(12), 4478–4485, doi:10.1021/es703009q, 2008.
- 110 Jorgensen, A. D., Picel, K. C. and Stamoudis, V. C.: Prediction of Gas Chromatography Flame Ionization Detector Response Factors from Molecular Structures, *Anal. Chem.*, 62(7), 683–689, doi:10.1021/ac00206a007, 1990.
- Scanlon, J. T. and Willis, D. E.: Calculation using effective carbon number, *J. Chromatogr. Sci.*, 23, 333–340, doi:10.1093/chromsci/23.8.333, 1985.
- US EPA: Estimation Programs Interface Suite for Microsoft Windows, 2019.
