# Supplementary material for: A new approach for measuring the carbon and oxygen content of atmospherically relevant compounds and mixtures
Source: Copernicus journal article supplement (doi:10.5194/amt-13-4911-2020), 2020-09-18
Supplement: Supplementary file 1 [file amt-13-4911-2020-supplement.zip › amt-2020-44_SupplementaryData.xlsx]

## Sheet: Sheet1
#	Compound	CAS #	Formula	O/C	Norm FID/CO2	ECN	Relative ECN		Functionality	VP (Pa) (EPI)	SMILES	Alkane	Alkene	Aromatic	Ether	Ester	Aldeyde	Ketone	Alcohol	Acid	Epoxide	Lactone (include with ketones)	Polycyclic aromatic (include w/aromatics)
												1
1	Heptane	142-82-5	C7H16	0	0.960151	7	1		alkane	6120	C(CCCCC)C	1
2	Octane	111-65-9	C8H18	0	0.987076	8	1		alkane	1980	C(CCCCCC)C	1
3	Nonane	111-84-2	C9H20	0	0.983196	9	1		alkane	661	C(CCCCCCC)C	1
4	Decane	124-18-5	C10H22	0	1.00002	10	1		alkane	231	C(CCCCCCCC)C	1
5	Undecane	1120-21-4	C11H24	0	1.00839	11	1		alkane	83.8	C(CCCCCCCCC)C	1
6	Dodecane	112-40-3	C12H26	0	1.00677	12	1		alkane	31.5	C(CCCCCCCCCC)C	1
7	Tridecane	629-50-5	C13H28	0	1.01961	13	1		alkane	12.3	C(CCCCCCCCCCC)C	1
8	Tetradecane	629-59-4	C14H30	0	1.00097	14	1		alkane	4.92	C(CCCCCCCCCCCC)C	1
9	Pentadecane	629-62-9	C15H32	0	1.01785	15	1		alkane	2.03	C(CCCCCCCCCCCCC)C	1
10	Hexadecane	544-76-3	C16H34	0	1.0067	16	1		alkane	0.929	C(CCCCCCCCCCCCCC)C	1
11	Heptadecane	629-78-7	C17H36	0	1.00974	17	1		alkane	0.432	C(CCCCCCCCCCCCCCC)C	1
12	Octadecane	593-45-3	C18H38	0	1.01733	18	1		alkane	0.195	C(CCCCCCCCCCCCCCCC)C	1
13	Nonadecane	629-92-5	C19H40	0	0.996566	19	1		alkane	0.0897	C(CCCCCCCCCCCCCCCCC)C	1
14	Icosane	112-95-8	C20H42	0	0.967396	20	1		alkane	0.0413	C(CCCCCCCCCCCCCCCCCC)C	1
15	Henicosane	629-94-7	C21H44	0	1.00495	21	1		alkane	0.0189	C(CCCCCCCCCCCCCCCCCCC)C	1
16	Docosane	629-97-0	C22H46	0	1.00903	22	1		alkane	0.00923	C(CCCCCCCCCCCCCCCCCCCC)C	1
17	Tricosane	638-67-5	C23H48	0	1.00619	23	1		alkane	0.00473	C(CCCCCCCCCCCCCCCCCCCCC)C	1
18	Tetracosane	646-31-1	C24H50	0	0.985625	24	1		alkane	0.00226	C(CCCCCCCCCCCCCCCCCCCCCC)C	1
19	Pentacosane	629-99-2	C25H52	0	0.999706	25	1		alkane	0.00128	C(CCCCCCCCCCCCCCCCCCCCCCC)C	1
20	Limonene	138-86-3	C10H16	0	0.929901	9.8	0.98		alkene	207	C(=CCC(C(=C)C)C1)(C1)C		1
21	1,2,4-Trimethylbenzene	95-63-6	C9H12	0	0.99	9	1		aromatic	215	c(ccc(c1C)C)(c1)C			1
22	Naphthalene	91-20-3	C10H8	0	0.992	10	1		polycyclic aromatic	5.38	c(c(ccc1)ccc2)(c1)c2			2									1
23	Isophytol*	505-32-8	C20H40O	0.05	0.952672	19.65	0.9825		alkene, alcohol	0.00188	OC(C=C)(CCCC(CCCC(CCCC(C)C)C)C)C		1						1
24	Patchouli alcohol	5986-55-0	C15H26O	0.0666667	0.959025	14.75	0.983333		alcohol	0.0328	OC(C(C(C(C1)C)CC2C3)(C3)C)(C2(C)C)C1								1
25	Butylated hydroxytoluene*	128-37-0	C15H24O	0.0666667	0.932987	14.36	0.957333		aromatic, alcohol	0.236	Oc(c(cc(c1)C)C(C)(C)C)c1C(C)(C)C			1					1
26	alpha-Cetone*	127-51-5	C14H22O	0.0714286	0.93573	12.8	0.914286		dialkene, ketone	1.3	O=C(C(=CC(C(=CCC1)C)C1(C)C)C)C		2					1
27	Methyl ionone*	7779-30-8	C14H22O	0.0714286	0.919504	12.8	0.914286		dialkene, ketone	0.868	O=C(C=CC(C(=CCC1)C)C1(C)C)CC		2					1
28	2-Dodecanol	10203-28-8	C12H26O	0.0833333	0.911821	11.25	0.9375		alcohol	0.381	OC(C)CCCCCCCCCC								1
29	Phytol acetate*	10236-16-5	C22H42O2	0.0909091	0.924484	20.9	0.95		alkene, ester	0.0048	O=C(OCC=C(CCCC(CCCC(CCCC(C)C)C)C)C)C		1			1
30	Linalool*	78-70-6	C10H18O	0.1	0.958437	9.55	0.955		dialkene, alcohol	11.1	OC(C=C)(CCC=C(C)C)C		2						1
31	alpha-Terpineol*	98-55-5	C10H18O	0.1	0.928952	9.65	0.965		alkene, alcohol	5.64	OC(C(CCC(=C1)C)C1)(C)C		1						1
32	Citronellal*	106-22-9	C10H20O	0.1	0.950171	9.4	0.94		alkene, alcohol	5.88	OCCC(CCC=C(C)C)C		1						1
33	2-Naphthol*	135-19-3	C10H8O	0.1	0.9415	9.36	0.936		polycyclic aromatic, alcohol	0.0218	Oc(ccc(c1ccc2)c2)c1			2					1				1
34	2-Nonanone	821-55-6	C9H18O	0.111111	0.888237	8	0.888889		ketone	86.2	O=C(CCCCCCC)C							1
35	1-Octanol	111-87-5	C8H18O	0.125	0.920859	7.5	0.9375		alcohol	13.2	OCCCCCCCC								1
36	Phenylethyl alcohol*	60-12-8	C8H10O	0.125	0.933397	7.5	0.9375		aromatic, alcohol	3.24	OCCc(cccc1)c1			1					1
37	Tetradecanoic acid ethyl ester	124-06-1	C16H32O2	0.125	0.897323	15	0.9375		ester	0.339	O=C(OCC)CCCCCCCCCCCCC					1
38	2-Hydroxycyclopentadecanone*	4727-18-8	C15H28O2	0.133333	0.933959	13.25	0.883333		ketone, alcohol	6.02e-05	C1CCCCCCC(C(=O)CCCCCC1)O							1	1
39	1,1,-Dimethyl-2-Phenyl ester butanoic acid*	10094-34-5	C14H20O2	0.142857	0.955622	13	0.928571		aromatic, ester	0.343	O=C(OC(Cc(cccc1)c1)(C)C)CCC			1		1
40	Benzyl benzoate*	120-51-4	C14H12O2	0.142857	0.918117	13	0.928571		aromatic (two rings), ester	0.0741	O=C(OCc(cccc1)c1)c(cccc2)c2			2		1
41	2-Heptanone	110-43-0	C7H14O	0.143	0.868333	6	0.857143		ketone	655	O=C(CCCCC)C							1
42	Methyl laurate	111-82-0	C13H26O2	0.153846	0.887892	12	0.923077		ester	1.45	O=C(OC)CCCCCCCCCCC					1
43	4-Tertbutyl cyclohexyl acetate	32210-23-4	C12H22O2	0.166667	0.910693	11	0.916667		ester	9.13	O=C(OC(CCC(C(C)(C)C)C1)C1)C					1
44	Benzene ethanol, alpha,alpha-dimethyl acetate*	151-05-3	C12H16O2	0.166667	0.873906	11	0.916667		aromatic, ester	3.17	O=C(OC(Cc(cccc1)c1)(C)C)C			1		1
45	Linalyl acetate*	115-95-7	C12H20O2	0.166667	0.934623	10.8	0.9		dialkene, ester	17.5	O=C(OC(C=C)(CCC=C(C)C)C)C		2			1
46	Hexanal	66-25-1	C6H12O	0.167	0.8509	5	0.833333		aldehyde	1280	O=CCCCCC						1
47	Peach lactone	104-67-6	C11H20O2	0.181818	0.850063	10	0.909091		lactone (ester)	0.545	O=C(OC(C1)CCCCCCC)C1					1						1
48	meta-Eugenol*	501-19-9	C10H12O2	0.181818	0.877708	8.48	0.848		alkene, aromatic, ether, alcohol	0.311	COC1=C(C=C(C=C1)CC=C)O		1	1	1				1
49	3,5,5- Trimethyl hexyl acetate	58430-94-7	C11H22O2	0.181818	0.944855	10	0.909091		ester	50.9	O=C(OCCC(CC(C)(C)C)C)C					1
50	Safrole*	94-59-7	C10H10O2	0.2	0.8632	8.34	0.834		alkene, aromatic, diether	0.24	O(c(c(O1)cc(c2)CC=C)c2)C1		1	1	2
51	Eugenol*	97-53-0	C10H12O2	0.2	0.945814	8.48	0.848		alkene, aromatic, ether, alcohol	1.26	O(c(c(O)ccc1CC=C)c1)C		1	1	1				1
52	Allyl heptanoate*	142-19-8	C10H18O2	0.2	0.907036	8.9	0.89		alkene, ester	30.2	O=C(OCC=C)CCCCCC		1			1
53	2-Methoxy-3-(2-Propenyl) phenol*	1941_12-4	C10H12O2	0.2	0.912109	8.48	0.848		alkene, aromatic, ether, alcohol	0.311	C=CCc1cccc(O)c1OC		1	1	1				1
54	Hydroxy-citronellal*	107-75-5	C10H20O2	0.2	0.84495	8.75	0.875		aldehyde, alcohol	0.773	O=CCC(CCCC(O)(C)C)C						1		1
55	Benzene methanol alpha-methyl acetate*	93-92-5	C10H12O2	0.2	0.859214	9	0.9		aromatic, ester	14.9	O=C(OC(c(cccc1)c1)C)C			1		1
56	Benzyl salicylate*	118-58-1	C14H12O3	0.214286	0.871135	12.36	0.882857		aromatic (two rings), ester,alcohol	0.0024	O=C(OCc(cccc1)c1)c(c(O)ccc2)c2			2		1			1
57	Benzyl acetate*	140-11-4	C9H10O2	0.222222	0.916895	8	0.888889		aromatic, ester	25	O=C(OCc(cccc1)c1)C			1		1
58	Hexanoic acid, propenyl ester*	123-68-2	C9H16O2	0.222222	0.816199	7.9	0.877778		alkene, ester	96.1	O=C(OCC=C)CCCCC		1			1
59	Hedione*	24851-98-7	C13H22O3	0.230769	0.886469	11	0.846154		ketone, ester	0.158	O=C(OC)CC(C(C(=O)C1)CCCCC)C1					1		1
60	2-Phenoxyethyl isobutyrate*	103-60-6	C12H16O3	0.25	0.87943	10	0.833333		aromatic, ether, ester	0.701	O=C(OCCOc(cccc1)c1)C(C)C			1	1	1
61	2-Hydroxy-2-Methylbutyl ester benzoic acid*	51115-63-0	C12H16O3	0.25	0.856997	10.36	0.863333		aromatic, ester, alcohol	0.0174	O=C(OCC(CC)C)c(c(O)ccc1)c1			1		1			1
62	Isoamyl salicylate*	87-20-7	C12H16O3	0.25	0.809714	10.36	0.863333		aromatic,ester, alcohol	0.0868	O=C(OCCC(C)C)c(c(O)ccc1)c1			1		1			1
63	Acetic acid, Hexyl ester	142-92-7	C8H16O2	0.25	0.801614	7	0.875		ester	194	O=C(OCCCCCC)C					1
64	Strawberry aldehyde*	77-83-8	C12H14O3	0.25	0.819905	10	0.833333		aromatic, ester, epoxide	0.423	O=C(OCC)C(O1)C1(c(cccc2)c2)C			1		1					1
65	Indan-1,3-Monopropionate*		C12H14O3	0.25	0.904015	10.25	0.854167		aromatic, ester, alcohol	0.0129	CCC(=O)OC1CC(C2=CC=CC=C12)O			1		1			1
66	1-Butanol	71-36-3	C4H10O	0.25	0.874	3.5	0.875		alcohol	1040	OCCCC								1
67	Ethylene brassylate*	105-95-3	C15H26O4	0.266667	0.839879	13	0.866667		dilactone (diester)	5.85e-05	O=C(OCCOC(=O)CCCCCCCCCC1)C1					2						2
68	Myristicin*	607-91-0	C11H12O3	0.272727	0.809463	8.56	0.778182		alkene,aromatic, triether	0.861	O(CO1)c(cc(c2)CC=C)c1c2OC		1	1	3
69	Indan-1,3-Diol monoacetate*		C11H12O3	0.272727	0.882166	9.25	0.840909		aromatic, ester, alcohol	0.0398	CC(=O)OC1CC(C2=CC=CC=C12)O			1		1			1
70	Prenyl acetate*	1191-16-8	C7H12O2	0.285714	0.802648	5.9	0.842857		alkene, ester	556	O=C(OCC=C(C)C)C		1			1
71	Isopropanol	67-63-0	C3H8O	0.333	0.71	2.25	0.75		alcohol	6610	OC(C)C								1
72	1-Propanol	71-23-8	C3H8O	0.333	0.859	2.5	0.833333		alcohol	3090	OCCC								1
73	Diethyl phthalate*	84-66-2	C12H14O4	0.333333	0.841135	10	0.833333		aromatic, diester	0.339	O=C(OCC)c(c(ccc1)C(=O)OCC)c1			1		2
74	Ethyl vanillin*	121-32-4	C9H10O3	0.333333	0.885948	6.78	0.753333		aromatic,aldehyde,ether,alcohol	0.039	O=Cc(ccc(O)c1OCC)c1			1	1		1		1
75	Vanillin*	121-33-5	C8H8O3	0.375	0.778327	5.78	0.7225		aromatic,aldehyde,ether,alcohol	0.0595	O=Cc(ccc(O)c1OC)c1			1	1		1		1
76	Piperonal*	120-57-0	C8H6O3	0.375	0.793242	5.64	0.705		aromatic,aldehyde,diether	1.41	O=Cc(ccc(OCO1)c12)c2			1	2		1
77	Isopropyl acetate	108-21-4	C5H10O2	0.4	0.73155	4	0.8		ester	8110	O=C(OC(C)C)C					1
78	Syringaldehyde*	134-96-3	C9H10O4	0.444444	0.750892	5.8	0.644444		aromatic,aldehyde,diether,alcohol	0.00865	O=Cc(cc(OC)c(O)c1OC)c1			1	2		1		1
79	Maltol*	118-71-8	C6H6O3	0.5	0.730301	3.78	0.63		aromatic (pyrone), ketone, alcohol	0.00571	O1C(C)=C(O)C(=O)C=C1			1				1	1
80	1-Methoxy-2-Propanol*	107-98-2	C4H10O2	0.5	0.631	2.25	0.5625		ether,alcohol	984	O(CC(O)C)C				1				1
81	Ethyl acetoacetate ethylene ketal*	6413_10-1	C8H14O4	0.5	0.615955	5	0.625		diether,ester	18.1	O=C(OCC)CC(OCC1)(O1)C				2	1
82	5-Hydroxymethyl-2-(Dimethoxymethyl)furan*	90200-14-9	C8H12O4	0.5	0.773402	4.78	0.5975		aromatic(furan), diether, alcohol	0.168	COC(C1=CC=C(O1)CO)OC			1	2				1
83	HEM (Hydroxyethyl methacrylate)*	868-77-9	C6H10O3	0.5	0.662	4.4	0.733333		alkene, ester,alcohol	10.6	O=C(OCCO)C(=C)C		1			1			1
84	Ethanol	64-17-5	C2H6O	0.5	0.807	1.5	0.75		alcohol	8120	OCC								1
85	Propylene glycol	57-55-6	C3H8O2	0.666667	0.613	1.75	0.583333		di-alcohol	14.8	OCC(O)C								2
86	Hydroxyacetone*	116-09-6	C3H6O2	0.666667	0.596	1.5	0.5		ketone,alcohol	232	O=C(C)CO							1	1
87	Pentaerythritol	115-77-5	C5H12O4	0.8	0.656	3	0.6		tetra-alcohol	3.38e-06	OCC(CO)(CO)CO								4
88	Acetic acid	64-19-7	C2H4O2	1	0.5413	1	0.5		acid	2290	O=C(O)C									1
89	Glycerol	56-81-5	C3H8O3	1	0.382	1.25	0.416667		tri-alcohol	0.0106	OCC(O)CO								3
											total (compounds containing one or more)	20	18	29	13	29	6	8	35	1	1	2	2
											Total multifunctional compounds (of differing type)	46
									Min VP =	3.38e-06
									Max VP =	8120
	Discards							Notes
	Methanol	67-56-1	CH4O	1	0.735	0.5	0.5	Anomalous behavior (see Holm, 1997)	alcohol	15800	OC
	Musk Ketone*	81-14-1	C14H18N2O5	0.357	0.844	NA	NA	Only compound with nitrogen, ECN uncertain	aromatic,ketone, dinitro	7.78e-05	O=C(c(c(c(N(=O)=O)c(c1N(=O)=O)C(C)(C)C)C)c1C)C
